# Supplementary material
Source: Springer Nature journal article supplement (https://www.springermedizin.de/resource/supplementary/12984_2008_180_MOESM1_ESM.pdf/9605474)
Supplement: MOESM1 [file 9605474]

| Control strategies for robot-assisted therapy                                                                          |                                                             |                                                   | Examples for upper extremity    | Examples for lower extremity  |
|------------------------------------------------------------------------------------------------------------------------|-------------------------------------------------------------|---------------------------------------------------|---------------------------------|-------------------------------|
| <b>Assistance Strategies</b>                                                                                           |                                                             | Position control                                  | [17,18,20–22,24,25,34,45,51–70] | [8–12,15,28,31,71–75,111,112] |
|                                                                                                                        | Impedance-based                                             | channel                                           | [17,18,56,80–82]                | [9]                           |
| • Make task safer to allow practice                                                                                    |                                                             | Velocity-field channel                            | [71]                            | [77]                          |
| • Enhance somatosensory input in a way correlated with motor output                                                    |                                                             | Moving back wall                                  | [45,50,55]                      | [71]                          |
|                                                                                                                        |                                                             | Time/force/error-based trigger                    | [24,27,38,45,55,56,77,79,83–86] | [9]                           |
| • Increase task success to motivate practice                                                                           |                                                             | Passive gravity counterbalancing                  | [17,33,88,89]                   | [32,90,91]                    |
|                                                                                                                        | Counterbalance-based                                        | Active weight compensation                        | [18,92–94]                      | [14,29,95]                    |
| • Provide appropriate challenge point for optimal learning                                                             |                                                             | Counterpoise control                              | [23,96]                         | ...                           |
| • Reinforce normative sensory-motor pathways                                                                           | EMG-based                                                   | EMG-triggered impedance force proportional to EMG | [19,25,55,87]<br>[97–99]        | ...<br>[30,100,101]           |
| • Interleave effort, which stimulates neuroplasticity, with stretching, which reduces soft tissue and reflex stiffness |                                                             | Modulate stiffness                                | [55,94]                         | [10,105,107]                  |
|                                                                                                                        |                                                             | Modulate desired movement time                    | [55]                            | [7,103,104]                   |
|                                                                                                                        |                                                             | Modulate desired movement path                    | [50]                            | [10]                          |
|                                                                                                                        | Performance-based adaptive assistance                       | Modulate assistance force                         | [46]                            | ...                           |
|                                                                                                                        |                                                             | Learn static model of weakness                    | [50]                            | ...                           |
| • Allow more repetitions, since participant completes movements more efficiently                                       |                                                             | Learn time-based model of forces                  | [110]                           | ...                           |
|                                                                                                                        |                                                             | Adjust unstable force field gain                  | [102]                           | ...                           |
|                                                                                                                        |                                                             | Minimize sum of error and effort                  | ...                             | [6]                           |
| <b>Challenge-Based Strategies</b>                                                                                      | Resistance                                                  | Constant resistance                               | [33,58–60,81,108,123–126,163]   | [73,120,121]                  |
|                                                                                                                        |                                                             | Viscous resistance                                | [45]                            | [127]                         |
| • Increase neural and muscle plasticity by increasing activation and force                                             |                                                             | Cancel gravity only as needed                     | [50,92–94,128]                  | [9]                           |
| • Discourage abnormal movements or disuse of impaired limb                                                             | Constraint-induced                                          | Resist asymmetric movements                       | ...                             | [131]                         |
|                                                                                                                        |                                                             | Resist movement of unimpaired arm                 | [130]                           | ...                           |
|                                                                                                                        |                                                             | Halt movement if off-axis forces are large        | [96,102,113]                    | ...                           |
| • Drive learning with larger errors                                                                                    |                                                             | Increase kinematic error                          | [133]                           | [132]                         |
|                                                                                                                        | Error-amplification                                         | Amplify visual representation of error            | [135–137]                       | ...                           |
|                                                                                                                        |                                                             | Increase limb phasing error                       | ...                             | [134]                         |
| <b>Haptic Simulation Strategies</b>                                                                                    | Simulate interaction with physical objects                  |                                                   | [17,18,21,63,64,138–144]        | [15,78,145,146,172]           |
| Make practice more flexible, convenient, safe, and motivating                                                          | Robotically present real objects for manipulation           |                                                   | [4,5]                           | ...                           |
| <b>Embodied Coaching Strategies</b>                                                                                    | Mobile robot gives instructions based on monitored movement |                                                   |                                 | [3]                           |
| Motivate practice with an embodied coach                                                                               |                                                             |                                                   |                                 |                               |
